# Supplementary figures and images for: Genome-Wide Transcriptome Profiling Reveals Genes Associated with Meiotic Drive System of Aedes aegypti
Source: MDPI journal article supplement (doi:10.3390/insects10010025), 2019-01-10

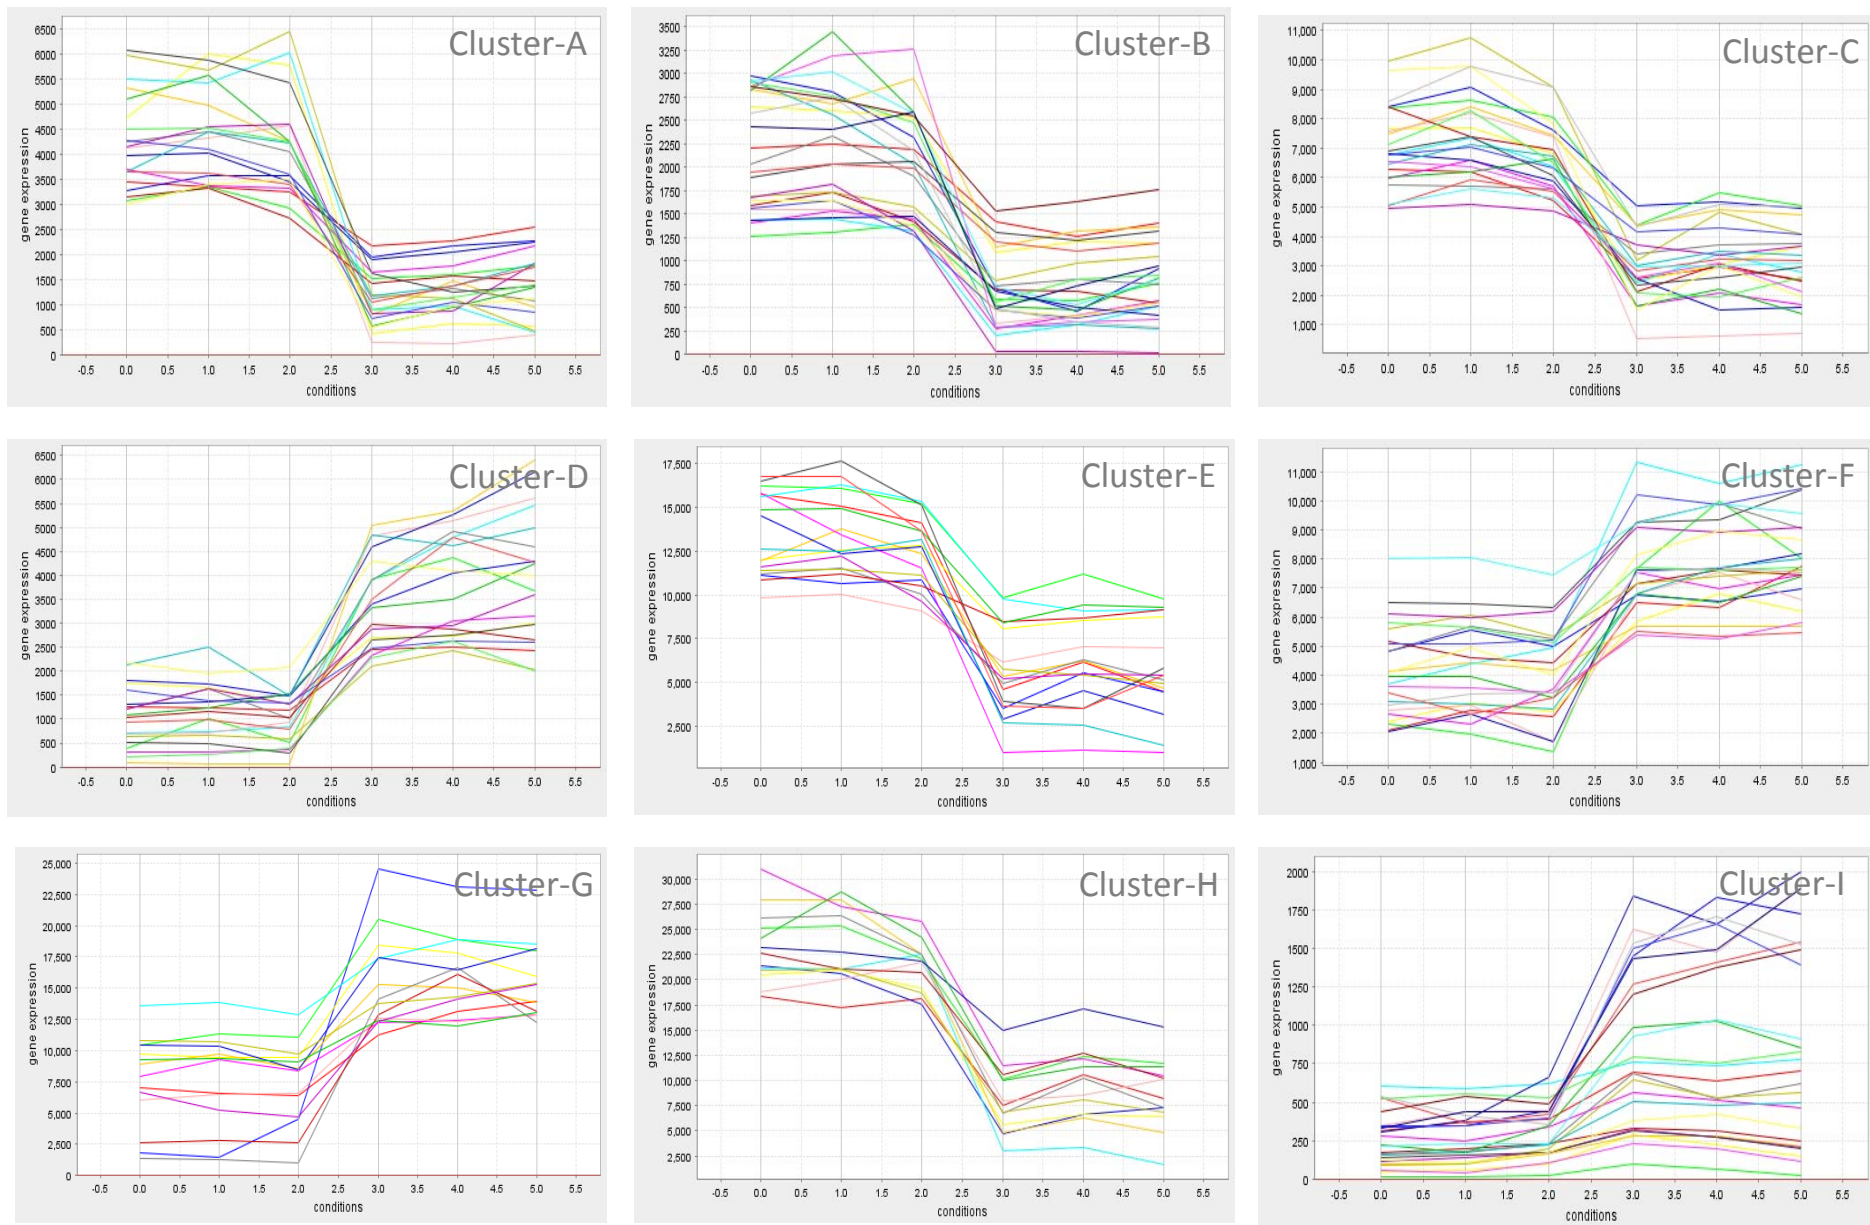

Figure S1. Correlated expression changes of genes among the samples of T37 and RED.

Supplement: s1 [file s1]
